# Supplementary material for: Suicide Risk, Alcohol Consumption and Attitudes towards Psychological Help-Seeking among Lithuanian General Population Men, Conscripts and Regular Active Duty Soldiers
Source: Int J Environ Res Public Health. 2023 Feb 16;20(4):3457. doi: 10.3390/ijerph20043457 (PMC9961175; doi:10.3390/ijerph20043457)
Supplement: Supplementary file 1 [file ijerph-20-03457-s001.zip › ijerph-2178956-supplementary.pdf]

## Supplementary Materials

**Table S1.** Descriptive statistics of study variables.

| Variable | Min.-max. | Mean | SD   | Skewness | Kurtosis |
|----------|-----------|------|------|----------|----------|
| SBQ-R    | 3-18      | 5.02 | 2.78 | 1.88*    | 3.86*    |
| AUDIT-C  | 0-12      | 3.63 | 2.83 | 0.5      | -0.34    |
| SUPPRESS | 0-4       | 0.54 | 0.86 | 1.72*    | 2.66*    |
| VALUE    | 0-15      | 7.83 | 3.55 | 0        | -0.52    |
| OPENNESS | 0-15      | 7.17 | 3.98 | -0.15    | -0.84    |

*Note.* SBQ-R = suicide risk; AUDIT-C = alcohol consumption; SUPPRESS = alcohol use as a means to suppress difficult thoughts and feelings; VALUE = perceived professional psychological help value; OPENNESS = openness for professional psychological help; \* Skewness and kurtosis higher than would be expected in a normally distributed measure.

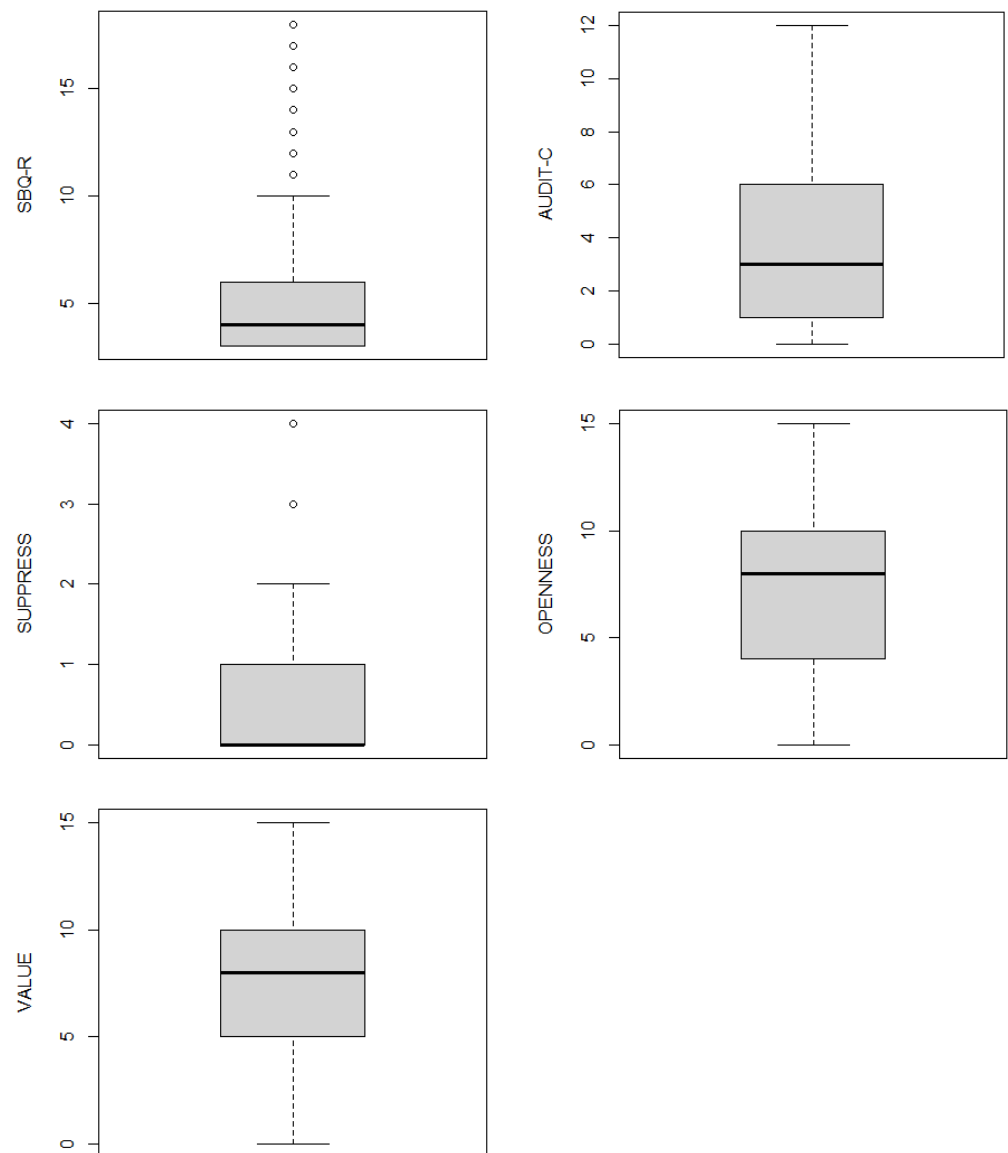

**Figure S1.** Box plots of study variables.
